# Supplementary material
Source: MDPI journal article supplement (https://www.mdpi.com/2227-9717/9/2/212)
Supplement: s1 [file s1]

# Construction of an Artificial Cell Capable of Protein Expression at Low Temperatures Using a Cell Extract Derived from *Pseudomonas fluorescens*

Mana Fukumoto <sup>1</sup>, Taishi Tonooka <sup>2,\*</sup>

<sup>1</sup> Division of Mechanophysics, Graduate School of Science and Technology, Kyoto Institute of Technology, Matsugasaki, Sakyo-ku, Kyoto 606-8585, Japan

<sup>2</sup> Faculty of Mechanical Engineering, Kyoto Institute of Technology, Matsugasaki, Sakyo-ku, Kyoto 606-8585, Japan

\* Correspondence: tonooka@kit.ac.jp

## Validation of protein expression capability of the cell-free protein expression system derived from the LacZ-deficient *E. coli* strain

In this study, the developed cell-free protein expression system derived from *P. fluorescens* was compared with that derived from *E. coli* the aspect of protein expression capability. To do so, protein expression capability of the cell-free protein expression system made from the LacZ-deficient *E. coli* strain was validated to be equivalent to that made from *E. coli* in the previous literature [1].

We chose a fluorescent protein, GFP, as a model protein to measure protein expression capability. Amount of GFP expressed in the cell-free protein expression system derived from the LacZ-deficient *E. coli* strain was compared with that in the literature (~ 26  $\mu\text{M}$ ) [1]. GFP was expressed in the cell-free protein expression system derived from the LacZ-deficient *E. coli* strain as below. For GFP synthesis in 10  $\mu\text{L}$  of the cell-free protein expression system, 4.0  $\mu\text{L}$  of Premix (S30 Premix Plus in S30 T7 High-Yield Protein Expression System purchased from Promega), 3.6  $\mu\text{L}$  of the cell extract from the LacZ gene-deficient BL21-Gold (DE3) strain, 1.0  $\mu\text{L}$  of DNA encoding GFP after T7 promoter, 1.0  $\mu\text{L}$  of 50 U/ $\mu\text{L}$  T7 RNA polymerase (Takara), and 0.4  $\mu\text{L}$  of 1670 ng/ $\mu\text{L}$  tRNA (tRNA from *E. coli* Mre 600; Sigma-Aldrich) were mixed. The fluorescent intensity of this solution was recorded at 29°C using a plate reader (Infinite F200; Tecan) with a GFP filter unit.

To quantify the concentration of GFP in the cell-free protein expression system, a calibration line was prepared as shown in Fig. S1. The calibration line was determined as below. First, we prepared GFP solutions with designated concentrations. In detail, we used a recombinant fluorescent protein eGFP (NOVUS biologicals, Recombinant eGFP Protein) and prepared 1  $\mu\text{M}$ , 2  $\mu\text{M}$ , 3  $\mu\text{M}$ , and 4  $\mu\text{M}$  of eGFP solutions. We measured their fluorescence intensities with a plate reader. Linear fitting of these values of the fluorescence intensities derived Equation S1. Where,  $F$  [a.u.] represents the measured fluorescence intensity,  $C$  [ $\mu\text{M}$ ] represents the concentration of GFP.

$$F = 295.31C - 313.44 \quad (\text{S1})$$

Figure S2 shows the fluorescence intensity of the cell-free protein expression system derived from the LacZ-deficient *E. coli* strain during GFP expression. At 8 h, the value of the fluorescence intensity is approximately 8500. Applying this value to Equation (S1), the GFP concentration is calculated to be 29.84  $\mu\text{M}$ . This concentration is equivalent to that in the previous study, 0.75 mg/mL (= 25.86  $\mu\text{M}$ ) at 8 h [1]. Therefore, it was indicated that the cell-free protein expression system made from the LacZ-deficient *E. coli* strain in this study

had protein expression capability comparable to that in the previous literatures. Thus, it was concluded that the comparison between the cell-free protein expression system derived from *P. fluorescens* and *E. coli* in this study was valid.

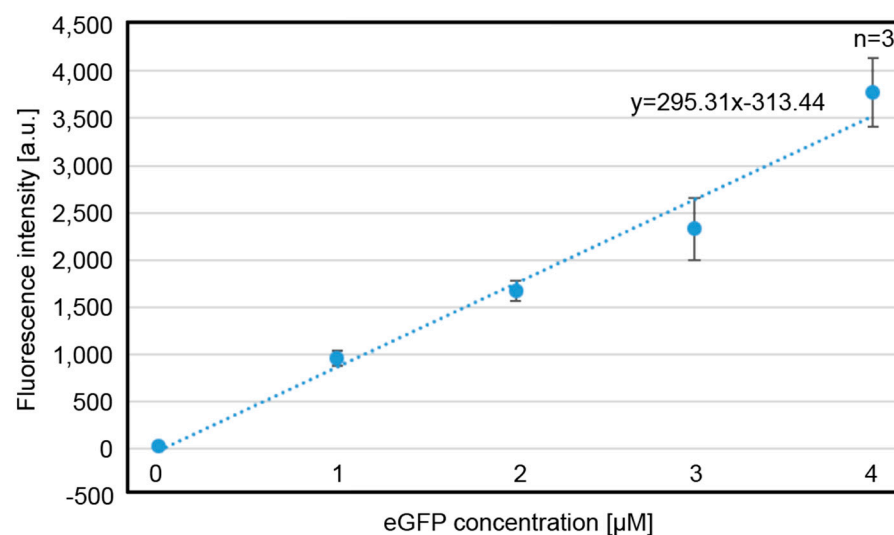

**Figure S1.** Relationship between concentration of eGFP and fluorescence intensity. Error bars represent standard deviations ( $n = 3$ ). The dotted line represents the approximate straight line.

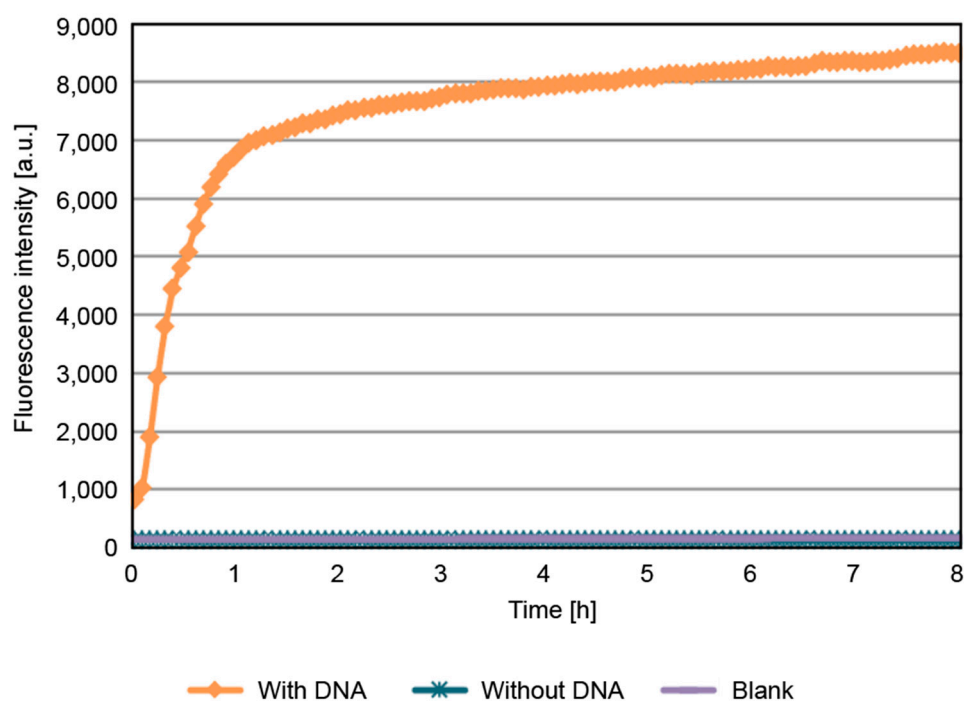

**Figure S2.** Time-course of fluorescence intensity of the GFP-expressing cell-free protein expression system derived from LacZ-deficient *E. coli* strain. With DNA: With final concentration of 63.2 ng/uL of DNA encoding deGFP under T7 promoter. Without DNA: Without the deGFP-encoding DNA. Blank: Without the solution (Background).

## References

1. Sun. Z.Z.; Hayes. A.C.; Shin. J.; Caschera. F.; Murray. M.R. Protocols for implementing an *Escherichia Coli* based TX-TL cell-free expression system for synthetic biology. *J Vis Exp* **2013**, 79, e50762.
